# Supplementary material
Source: PubMed Central journal article supplement (PMC10159978)
Supplement: NIHMS1880957-supplement-1.pdf [file NIHMS1880957-supplement-1.pdf]

| NSCLC     |       |      |                |                                                                                        |                |        |       |     |
|-----------|-------|------|----------------|----------------------------------------------------------------------------------------|----------------|--------|-------|-----|
| Cell line | KEAP1 | KRAS | EGFR           | TP53                                                                                   | STK11 (LKB1)   | NFE2L2 | Rb1   | Myc |
| A549      | G333C | G12S | WT             | WT                                                                                     | Q37*           | WT     | WT    | WT  |
| CALU3     | WT    | WT   | WT             | M237I                                                                                  | P315S<br>A316T | WT     | WT    | WT  |
| NCI-H1299 | WT    | WT   | WT             | ? (c.?(del))                                                                           | WT             | WT     | WT    | WT  |
| NCI-H1581 | WT    | WT   | WT             | Q144*                                                                                  | WT             | WT     | WT    | WT  |
| NCI-H1944 | R272L | G13D | WT             | WT                                                                                     | K62N<br>K78N   | WT     | WT    | WT  |
| NCI-H1975 | WT    | WT   | T745M<br>L813R | R273H                                                                                  | WT             | WT     | WT    | WT  |
| NCI-H1993 | WT    | WT   | WT             | C242W                                                                                  | E199*          | WT     | WT    | WT  |
| NCI-H2009 | WT    | G12A | WT             | R273L                                                                                  | WT             | WT     | WT    | WT  |
| NCI-H2347 | WT    | L19F | WT             | T125T                                                                                  | WT             | WT     | WT    | WT  |
| NCI-H460  | D236H | Q61H | WT             | WT                                                                                     | Q37*           | WT     | WT    | WT  |
| NCI-HCC15 | G364C | WT   | WT             | D259V                                                                                  | WT             | WT     | K652* | WT  |
| NCI-H1792 | G462W | G12C | WT             | ? (c.672+1G>A)<br>? (c.276+1G>A)<br>? (c.555+1G>A)<br>? (c.195+1G>A)<br>? (c.639+1G>A) | WT             | WT     | WT    | WT  |
| NCI-H2172 | G430C | WT   | S1130G         | V73fs                                                                                  | WT             | WT     | A562P | WT  |

  

| SCLC      |       |      |                                                                                                                                                                                                                         |                                                                                        |              |                                                                 |            |     |
|-----------|-------|------|-------------------------------------------------------------------------------------------------------------------------------------------------------------------------------------------------------------------------|----------------------------------------------------------------------------------------|--------------|-----------------------------------------------------------------|------------|-----|
| Cell line | KEAP1 | KRAS | EGFR                                                                                                                                                                                                                    | TP53                                                                                   | STK11 (LKB1) | NFE2L2                                                          | Rb1        | Myc |
| DMS79     | WT    | WT   | WT                                                                                                                                                                                                                      | R280fs<br>P278P                                                                        | WT           | WT                                                              | G801*      | WT  |
| H211      | WT    | WT   | WT                                                                                                                                                                                                                      | p.R248Q                                                                                | WT           | WT                                                              | WT         | WT  |
| H526      | WT    | WT   | WT                                                                                                                                                                                                                      | ? (c.97-1G>C)                                                                          | WT           | WT                                                              | E31*       | WT  |
| 16HC      | -     | -    | -                                                                                                                                                                                                                       | -                                                                                      | -            | -                                                               | -          | -   |
| 16HV      | -     | -    | -                                                                                                                                                                                                                       | -                                                                                      | -            | -                                                               | -          | -   |
| 86M1      | -     | -    | -                                                                                                                                                                                                                       | -                                                                                      | -            | -                                                               | -          | -   |
| H146      | WT    | WT   | WT                                                                                                                                                                                                                      | P318fs                                                                                 | WT           | WT                                                              | Q850*      | WT  |
| H1838     | WT    | WT   | WT                                                                                                                                                                                                                      | R273L                                                                                  | WT           | WT                                                              | WT         | WT  |
| H209      | WT    | WT   | ? (c.1880+2622A>G)<br>? (c.2470-1308G>C)<br>? (c.1881-464A>G)<br>? (c.1881-2248A>G)<br>? (c.1745+2622A>G)<br>? (c.2335-1308G>C)<br>? (c.1745+2622A>G)<br>? (c.2335-1308G>C)<br>? (c.1262+2622A>G)<br>? (c.*460-1308G>C) | ? (c.673-2A>T)<br>? (c.277-2A>T)<br>? (c.556-2A>T)<br>? (c.196-2A>T)<br>? (c.640-2A>T) | WT           | ? (c.-3-32989G>T)<br>? (c.-378+23754G>A)<br>? (c.-378+22755G>T) | C706F      | WT  |
| H2107     | -     | -    | -                                                                                                                                                                                                                       | K101*                                                                                  | -            | -                                                               | -          | -   |
| H524      | WT    | WT   | WT                                                                                                                                                                                                                      | T155N                                                                                  | WT           | WT                                                              | S576*      | WT  |
| H740      | S348C | WT   | WT                                                                                                                                                                                                                      | R267P                                                                                  | WT           | WT                                                              | S576*      | WT  |
| H82       | WT    | WT   | WT                                                                                                                                                                                                                      | T125T                                                                                  | WT           | WT                                                              | c.940-2A>T | WT  |
| H841      | WT    | WT   | WT                                                                                                                                                                                                                      | C242S                                                                                  | WT           | WT                                                              | WT         | WT  |
| HCC33     | WT    | WT   | Q71L                                                                                                                                                                                                                    | C242Y                                                                                  | WT           | WT                                                              | S402fs     | WT  |
| N417      | WT    | WT   | WT                                                                                                                                                                                                                      | E298* (c.?)                                                                            | WT           | WT                                                              | WT         | WT  |
| SW210.5   | -     | -    | -                                                                                                                                                                                                                       | -                                                                                      | -            | -                                                               | -          | -   |

  

| PDAC      |       |               |      |         |              |        |     |     |
|-----------|-------|---------------|------|---------|--------------|--------|-----|-----|
| Cell line | KEAP1 | KRAS          | EGFR | TP53    | STK11 (LKB1) | NFE2L2 | Rb1 | Myc |
| PATU8902  | WT    | G12V          | WT   | C176S   | WT           | WT     | WT  | WT  |
| MiaPaca2  | WT    | G12C          | WT   | R248W   | WT           | WT     | WT  | WT  |
| PL45      | WT    | G12D          | WT   | L255N   | WT           | WT     | WT  | WT  |
| T3M4      | WT    | Q61H          | WT   | Y220C   | WT           | WT     | WT  | WT  |
| 8988T     | WT    | G12V          | WT   | R282W   | WT           | WT     | WT  | WT  |
| BXPC3     | WT    | WT            | WT   | Y220C   | WT           | WT     | WT  | WT  |
| CFPAC     | WT    | G12V<br>A146A | WT   | C242R   | WT           | WT     | WT  | WT  |
| MPANC96   | WT    | G12V          | WT   | WT      | WT           | WT     | WT  | WT  |
| PANC1     | WT    | G12D          | WT   | R273H   | WT           | WT     | WT  | WT  |
| SUIT2     | WT    | G12D          | WT   | R273H   | WT           | WT     | WT  | WT  |
| SW1990    | WT    | G12D          | WT   | P191del | WT           | WT     | WT  | WT  |

  

| HCC       |       |      |      |              |              |        |       |     |
|-----------|-------|------|------|--------------|--------------|--------|-------|-----|
| Cell line | KEAP1 | KRAS | EGFR | TP53         | STK11 (LKB1) | NFE2L2 | Rb1   | Myc |
| HepG2     | WT    | WT   | WT   | WT           | WT           | WT     | WT    | WT  |
| Hep3B     | WT    | WT   | WT   | ? (c.?(del)) | WT           | WT     | S576* | WT  |
| Alex      | WT    | WT   | WT   | R249S        | D194N        | WT     | WT    | WT  |
| SNU398    | WT    | WT   | WT   | E224E        | WT           | WT     | WT    | WT  |
| SNU449    | WT    | WT   | WT   | A161T        | WT           | WT     | WT    | WT  |

### **Supplementary Figure S1.**

Mutation status of *KEAP1*, *KRAS*, *EGFR*, *TP53*, *STK11*, *NFE2L2*, *RB1*, and *MYC* in NSCLC, SCLC, PDAC, and HCC cell lines was determined from DepMap Portal (black), COSMIC (red), and the *TP53* Database (purple). WT, wild type; -, no information available.
