# Supplementary material
Source: PubMed Central journal article supplement (PMC10159978)
Supplement: NIHMS1880957-supplement-2.pdf [file NIHMS1880957-supplement-2.pdf]

## Supplementary Figure S2.

Cystathionine and homocysteine rescue NSCLC cell viability under cystine starvation (related to Fig. 1). **A**, Measurement of relative NSCLC cell number under cystine-replete (200  $\mu$ M) or cystine-starved (0  $\mu$ M) conditions supplemented with 1 mM cystathionine or 1 mM homocysteine. **B**, Measurement of relative NSCLC cell number under cystine-starved condition treated with cystathionine or homocysteine in the presence or absence of 100  $\mu$ M of propargylglycine. Relative cell number was determined by crystal violet staining, followed by normalization to cystine-replete, untreated conditions. For **A** and **B**, data are presented as mean  $\pm$  SD. **C**, Labeled fraction of serine and concentration of homocysteine, cystathionine, cysteine, and glutathione after 24 h  $^{13}\text{C}_3$ -serine labeling in H2009 under cystine-replete (200  $\mu$ M) or cystine-starved (0  $\mu$ M) condition supplemented with 1 mM cystathionine or 1 mM homocysteine. N=3 biological replicates for each condition. \* $p < 0.05$ , \*\* $p < 0.01$ , \*\*\* $p < 0.001$ , and \*\*\*\* $p < 0.0001$ . Cys, cysteine; (Cys)<sub>2</sub>, cystine; Cth, cystathionine; Hcy, homocysteine; PPG, propargylglycine; GSH, glutathione; Ser, serine.
