# Supplementary material
Source: PubMed Central journal article supplement (PMC10159978)
Supplement: NIHMS1880957-supplement-7.pdf [file NIHMS1880957-supplement-7.pdf]

**A**

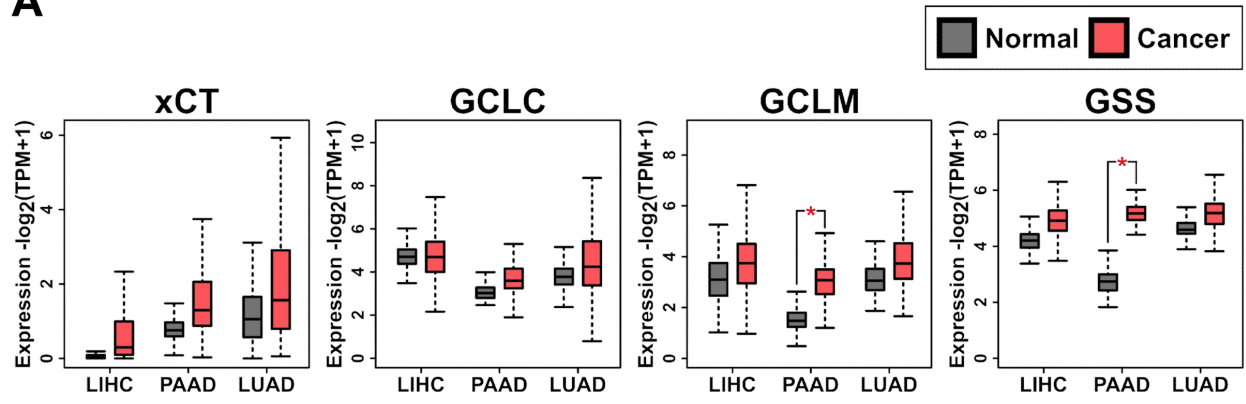

**Supplementary Figure S7.**

**A,** Log scaled gene expression profile for xCT, GCLC, GCLM, and GSS in LIHC (liver hepatocellular carcinoma), PAAD (pancreatic adenocarcinoma), and LUAD (lung adenocarcinoma) datasets in TCGA and GTEx.  $|\text{Log}_2\text{FC}|$  cutoff, 1; p-value cutoff, 0.01; log-scale,  $\log_2(\text{TPM}+1)$ .
